# Supplementary material for: Stomach-brain synchrony reveals a novel, delayed-connectivity resting-state network in humans
Source: eLife journal article supplement (doi:10.7554/elife.33321), 2018-03-21
Supplement: supp [file elife-33321-supp-v1.zip]

Archive with 11 entries (11 files):
- elife_poa_e33321_Figure_3_source_data_1.csv
- elife_poa_e33321_Table_2_source_data_1.csv
- elife_poa_e33321_Figure_2_source_data_2.csv
- elife_poa_e33321_Figure_3_source_data_2.csv
- elife_poa_e33321_Figure_4_source_data_2.csv
- elife_poa_e33321_Figure_3_source_data_3.csv
- elife_poa_e33321_Figure_4_source_data_1.csv
- elife_poa_e33321_Figure_2_figure_supplement_1.ai
- elife_poa_e33321_Figure_2_source_data_1.csv
- elife_poa_e33321_Transparent_Reporting_File.pdf
- elife_poa_e33321_Figure_3_figure_supplement_1.ai
