# Supplementary material for: Stomach-brain synchrony reveals a novel, delayed-connectivity resting-state network in humans
Source: eLife journal article supplement (doi:10.7554/elife.33321), 2018-03-21
Supplement: supp [file elife-33321-supp-v1.zip › elife_poa_e33321_Figure_2_source_data_1.csv]

'-0.007'	'-0.005'	'-0.003'	'-0.001'	'0'	'0.001'	'0.003'	'0.005'	'0.007'
111.5244584423	351.236851899	1440.4338793747	1647.1683792215	2413.1454100829	2284.8720695672	1839.1561336596	1451.2158702233	996.3959150772
