# Supplementary material for: Stomach-brain synchrony reveals a novel, delayed-connectivity resting-state network in humans
Source: eLife journal article supplement (doi:10.7554/elife.33321), 2018-03-21
Supplement: supp [file elife-33321-supp-v1.zip › elife_poa_e33321_Figure_2_source_data_2.csv]

60318.70606	69876.93129	62677.00296	60972.2707	60529.13654	76023.27813	63251.96862	59608.19878	64963.94558	60450.45556	60751.42999	73974.74739	62743.24604	58668.29897	61986.54899	63076.07261	68457.3765	61492.2181	72894.15083	61947.35247	59958.09678	60936.5179	67978.23771	58837.13751	58813.70807	66716.15293	69710.03412	58866.05149	68417.20473	58147.09527	63738.09229	61635.25913	65926.29675	66944.59565	62241.79356	60708.90596	59119.09108	62931.31545	62799.71728	60826.8434	58620.11437	61986.51082	64823.69818	58668.03957	58714.94686	63679.28448	61667.77463	64034.31508	61509.43985	61894.77468
[truncated: 951 more columns]
