# Supplementary material for: Stomach-brain synchrony reveals a novel, delayed-connectivity resting-state network in humans
Source: eLife journal article supplement (doi:10.7554/elife.33321), 2018-03-21
Supplement: supp [file elife-33321-supp-v1.zip › elife_poa_e33321_Figure_3_source_data_1.csv]

Cluster#	Area name	N voxels	mm3	% area in cluster	t in peak	x	y	z
1	Hippocampus_L	15	45	9,458208155	5,966924667	-18	-25	-11
1	Hippocampus_R	3	9	1,863646934	5,306155205	18	-13	-14
1	ParaHippocampal_L	24	72	14,42134969	6,560622215	-18	-31	-14
1	ParaHippocampal_R	6	18	3,114858657	5,34218502	18	-28	-14
1	Lingual_L	56	168	15,70860143	5,475696564	-6	-76	-11
1	Occipital_Inf_R	3	9	1,782618807	5,330095291	45	-61	-17
1	Fusiform_L	42	126	10,68490909	5,670484066	-33	-61	-20
1	Fusiform_R	81	243	18,90439635	5,901584148	42	-61	-23
1	Pallidum_L	7	21	14,03989761	5,585568905	-21	-10	-5
1	Thalamus_L	29	87	15,49311818	6,566147804	-3	-25	4
1	Thalamus_R	29	87	16,1233964	5,689767838	6	-25	7
1	Temporal_Inf_R	20	60	3,304301378	5,597514629	48	-61	-23
1	Cerebelum_Crus1_L	299	897	67,50416058	6,086358547	-36	-79	-35
1	Cerebelum_Crus1_R	291	873	64,58155967	6,133453369	36	-46	-41
1	Cerebelum_Crus2_L	233	699	72,29520063	6,224063873	-39	-79	-38
1	Cerebelum_Crus2_R	168	504	46,63606991	6,048042297	24	-82	-35
1	Cerebelum_4_5_L	28	84	14,62645333	5,60422945	-18	-52	-14
1	Cerebelum_4_5_R	62	186	42,31770035	6,316662312	24	-40	-23
1	Cerebelum_6_L	247	741	85,68742031	6,064485073	-33	-61	-23
1	Cerebelum_6_R	212	636	69,40726462	6,011203766	30	-73	-23
1	Cerebelum_7b_L	30	90	30,13692308	6,025842667	-9	-79	-47
1	Cerebelum_7b_R	26	78	28,61314607	6,273806572	39	-52	-44
1	Cerebelum_8_L	38	114	11,83437202	6,736455441	-24	-43	-50
1	Cerebelum_8_R	45	135	11,45803726	6,326149464	36	-49	-44
1	Cerebelum_9_L	20	60	13,52520138	6,125957489	-21	-43	-47
1	Cerebelum_9_R	2	6	1,452830655	5,236619949	21	-46	-50
1	Cerebelum_10_R	1	3	3,696037736	5,246775627	27	-43	-44
1	Vermis_4_5	5	15	4,418571429	5,491329193	6	-58	-20
1	Vermis_6	58	174	91,87293801	5,797070026	6	-67	-20
1	Vermis_7	28	84	84,81835052	5,517460346	6	-76	-23
2	Insula_R	7	21	2,324118644	5,618645191	42	-10	-11
2	Hippocampus_R	36	108	22,36376321	6,588088989	39	-10	-17
2	ParaHippocampal_R	13	39	6,748860424	5,673674107	33	-10	-29
2	Amygdala_R	8	24	18,95709677	5,688852787	33	-4	-20
2	Fusiform_R	36	108	8,401953932	6,238637447	33	-13	-32
2	Putamen_R	2	6	1,104642857	5,21925354	36	-16	-8
2	Temporal_Sup_R	9	27	1,683868195	5,777946472	45	-7	-14
2	Temporal_Pole_Sup_R	6	18	2,63529148	5,219078541	36	5	-26
2	Temporal_Mid_R	77	231	10,26323203	6,468038559	51	-4	-29
2	Temporal_Pole_Mid_R	68	204	33,66601516	6,572336197	45	5	-38
2	Temporal_Inf_R	96	288	15,86064661	6,588531017	48	5	-38
3	Fusiform_L	9	27	2,289623377	5,503945351	-33	-16	-32
4	Temporal_Inf_L	34	102	6,24399375	5,8745327	-51	-4	-35
5	Temporal_Pole_Sup_L	15	45	6,859961089	5,984568596	-33	17	-32
5	Temporal_Pole_Mid_L	37	111	28,79972185	6,048834324	-36	14	-32
6	Hippocampus_L	8	24	5,044377682	6,293356895	-36	-16	-14
6	Temporal_Sup_L	8	24	2,047630662	5,792312622	-48	-19	-5
6	Temporal_Mid_L	84	252	9,988725212	7,058661461	-48	-22	-8
6	Temporal_Inf_L	11	33	2,020115625	5,591918468	-42	-37	-17
7	Precentral_L	8	24	1,333340896	5,377715588	-27	-13	67
7	Precentral_R	253	759	43,97530612	6,234174728	45	-7	61
7	Frontal_Sup_L	29	87	4,735323701	5,59264946	-15	5	49
7	Frontal_Sup_R	19	57	2,752892012	5,448665619	21	-16	70
7	Frontal_Mid_R	33	99	3,799590517	6,024432659	45	-7	58
7	Rolandic_Oper_R	18	54	7,947453043	6,08560276	51	-31	22
7	Supp_Motor_Area_L	95	285	26,00309735	6,195766449	-12	5	49
7	Supp_Motor_Area_R	29	87	7,187865879	5,511618137	9	-7	61
7	Olfactory_L	1	3	2,098821429	5,287792683	-6	26	-2
7	Cingulum_Ant_L	18	54	7,555757143	6,437456131	-6	29	13
7	Cingulum_Mid_L	90	270	27,24899536	6,090976238	0	-25	34
7	Cingulum_Mid_R	87	261	23,20802996	6,237471581	3	-25	34
7	Cingulum_Post_L	51	153	64,7325486	5,713541985	-3	-46	31
7	Cingulum_Post_R	20	60	35,08477612	5,721492767	3	-43	13
7	Calcarine_L	124	372	32,27240035	6,260571003	-15	-79	10
7	Calcarine_R	115	345	36,31491134	6,313747406	21	-82	4
7	Cuneus_L	186	558	71,62950197	6,115413189	-12	-82	13
7	Cuneus_R	77	231	31,77709972	5,99064064	18	-97	13
7	Lingual_L	11	33	3,085618138	5,470959663	-12	-85	1
7	Lingual_R	20	60	5,110173913	6,115015984	21	-79	1
7	Occipital_Sup_L	160	480	68,83396779	6,310954571	-9	-85	46
7	Occipital_Sup_R	26	78	10,81346072	5,71427536	15	-100	16
7	Occipital_Mid_L	352	1056	63,25988991	6,438160419	-36	-64	22
7	Occipital_Mid_R	4	12	1,120438513	5,566663742	24	-88	4
7	Postcentral_L	45	135	6,794745632	5,610329628	-27	-34	46
7	Postcentral_R	196	588	30,12904002	6,690896034	33	-37	37
7	Parietal_Sup_L	326	978	92,77502179	6,800959587	-9	-82	49
7	Parietal_Sup_R	154	462	40,72960396	6,062800407	30	-55	58
7	Parietal_Inf_L	95	285	22,81514099	6,014370918	-42	-52	37
7	Parietal_Inf_R	52	156	22,72032714	6,474416733	33	-43	49
7	SupraMarginal_L	6	18	2,807340764	5,916804314	-45	-49	34
7	SupraMarginal_R	106	318	31,55674772	6,777681351	30	-40	43
7	Angular_L	102	306	51,10173913	7,548890591	-39	-49	31
7	Angular_R	8	24	2,683424658	5,756495953	33	-46	40
7	Precuneus_L	515	1545	85,78516156	6,802535534	-6	-67	37
7	Precuneus_R	326	978	58,67700459	6,730111599	15	-49	46
7	Paracentral_Lobule_L	39	117	16,98971831	5,704933643	-6	-16	64
7	Paracentral_Lobule_R	49	147	34,44477273	5,637500763	6	-37	61
7	Caudate_L	14	42	8,552370062	5,804187775	-15	26	-2
7	Caudate_R	11	33	6,503390342	5,691803932	21	-4	22
7	Temporal_Sup_R	29	87	5,425797517	6,347546101	51	-37	22
7	Temporal_Mid_L	55	165	6,540236746	6,063453197	-39	-64	22
8	Temporal_Sup_L	11	33	2,81549216	5,669527531	-54	-49	16
8	Temporal_Mid_L	136	408	16,17222177	5,929871559	-51	-52	16
9	Temporal_Mid_R	9	27	1,199598548	5,63126421	51	-40	-2
10	Rolandic_Oper_R	8	24	3,532201352	5,385025978	51	-4	4
10	Insula_R	10	30	3,320169492	5,578464031	48	-10	4
10	Heschl_R	5	15	11,80060241	5,452092171	48	-10	7
10	Temporal_Sup_R	9	27	1,683868195	5,565064907	51	-7	1
11	Frontal_Sup_Medial_L	22	66	4,321102941	5,686696053	-9	53	10
12	Postcentral_L	9	27	1,358949126	5,462663651	-66	-13	13
12	Temporal_Sup_L	6	18	1,535722997	5,368962288	-66	-19	10
13	Rolandic_Oper_R	9	27	3,973726521	5,340506077	42	-16	19
14	Angular_R	9	27	3,01885274	5,386130333	57	-67	25
15	Frontal_Sup_R	60	180	8,693343195	6,039288044	15	14	46
15	Supp_Motor_Area_R	15	45	3,717861662	5,51377821	12	14	46
15	Frontal_Sup_Medial_L	60	180	11,7848262	5,59044075	-3	32	49
15	Frontal_Sup_Medial_R	5	15	1,376921275	5,32351017	9	26	49
15	Cingulum_Mid_R	20	60	5,335179301	5,840031624	15	11	43
16	Postcentral_L	10	30	1,509943474	5,318675518	-42	-25	43
17	Frontal_Sup_R	14	42	2,028446746	5,574597359	21	35	52
