# Supplementary material for: Stomach-brain synchrony reveals a novel, delayed-connectivity resting-state network in humans
Source: eLife journal article supplement (doi:10.7554/elife.33321), 2018-03-21
Supplement: supp [file elife-33321-supp-v1.zip › elife_poa_e33321_Figure_3_source_data_2.csv]

Cluster#	Area name	N voxels	mm3	% area in cluster	t in peak	x	y	z
1	Calcarine_L	5	15	1,301306466	5,503283024	-3	-82	-11
1	Calcarine_R	110	330	34,73600215	5,7471838	18	-82	1
1	Cuneus_R	44	132	18,1583427	5,640126705	12	-70	19
1	Lingual_L	48	144	13,46451551	5,827580452	-9	-67	-11
1	Lingual_R	92	276	23,5068	5,889127254	18	-49	-11
1	Occipital_Sup_R	17	51	7,070339703	5,530203819	27	-73	19
1	Occipital_Mid_R	31	93	8,683398475	5,707376957	30	-73	19
1	Fusiform_L	16	48	4,070441558	5,585514545	-42	-64	-20
1	Fusiform_R	44	132	10,26905481	5,866550922	42	-58	-23
1	Cerebelum_Crus1_L	20	60	4,515328467	5,818234921	-3	-70	-26
1	Cerebelum_Crus1_R	176	528	39,05963746	6,359763622	24	-88	-23
1	Cerebelum_Crus2_L	35	105	10,85979409	6,604819298	-12	-76	-41
1	Cerebelum_Crus2_R	54	162	14,99016533	6,020287037	15	-76	-41
1	Cerebelum_4_5_L	85	255	44,40173333	6,610015392	-6	-61	-20
1	Cerebelum_4_5_R	107	321	73,03216028	6,957870483	9	-61	-17
1	Cerebelum_6_L	207	621	71,81091499	6,853730202	-12	-61	-23
1	Cerebelum_6_R	294	882	96,25347075	6,909934998	9	-64	-17
1	Cerebelum_7b_L	50	150	50,22820513	7,3764081	-12	-76	-47
1	Cerebelum_7b_R	22	66	24,2111236	5,735014915	12	-76	-44
1	Cerebelum_8_L	99	297	30,83165342	7,129993439	-27	-49	-50
1	Cerebelum_8_R	113	339	28,77240468	6,314418793	12	-73	-41
1	Cerebelum_9_L	26	78	17,5827618	6,181563854	-21	-49	-47
1	Cerebelum_9_R	10	30	7,264153276	5,814804554	21	-49	-50
1	Vermis_3	5	15	12,8875	5,342677116	0	-49	-20
1	Vermis_4_5	83	249	73,34828571	7,017578125	6	-61	-17
1	Vermis_6	95	285	100	7,07216835	6	-64	-17
1	Vermis_7	54	162	100	6,415637016	6	-64	-26
1	Vermis_8	41	123	99,15419753	6,234676361	6	-61	-26
2	ParaHippocampal_L	42	126	25,23736196	6,770783901	-24	2	-32
2	Amygdala_L	2	6	5,342454545	5,782288551	-24	-1	-29
2	Temporal_Pole_Sup_L	9	27	4,115976654	6,18363905	-21	5	-29
3	Precentral_L	124	372	20,66678389	7,476283073	-30	-16	46
3	Precentral_R	141	423	24,50797693	6,352735996	57	-1	19
3	Frontal_Sup_L	22	66	3,592314532	5,659879684	-24	29	31
3	Frontal_Mid_L	22	66	2,658593461	5,605192184	-24	29	28
3	Frontal_Mid_R	43	129	4,950981583	6,317605972	33	53	31
3	Frontal_Mid_Orb_L	2	6	1,323581081	5,162661076	-27	47	-8
3	Frontal_Inf_Oper_L	71	213	40,19708092	6,148738861	-42	8	13
3	Frontal_Inf_Oper_R	59	177	24,78379557	6,134293079	54	17	-2
3	Frontal_Inf_Tri_L	12	36	2,788469751	6,011062145	-30	29	-2
3	Frontal_Inf_Orb_L	22	66	7,650142012	6,194290161	-30	29	-5
3	Frontal_Inf_Orb_R	12	36	4,131247803	6,230875969	54	20	-5
3	Rolandic_Oper_L	156	468	92,60254545	6,290529251	-51	-4	10
3	Rolandic_Oper_R	210	630	92,7202855	6,467785358	57	-1	16
3	Supp_Motor_Area_L	272	816	74,45097345	7,250190735	-6	8	43
3	Supp_Motor_Area_R	197	591	48,82791649	7,522094727	12	8	46
3	Olfactory_L	7	21	14,69175	5,748688698	-24	5	-14
3	Frontal_Sup_Medial_L	13	39	2,553379011	6,364543915	-6	17	40
3	Rectus_L	2	6	1,379507042	5,30396986	-12	14	-14
3	Insula_L	238	714	75,27742734	6,38287735	-30	-28	22
3	Insula_R	85	255	28,22144068	5,94411087	36	-13	7
3	Cingulum_Ant_L	25	75	10,49410714	5,937246323	-6	17	28
3	Cingulum_Ant_R	35	105	15,66523229	5,905531883	6	17	28
3	Cingulum_Mid_L	279	837	84,47188563	7,181895256	-9	8	43
3	Cingulum_Mid_R	291	873	77,62685883	7,526398182	18	-28	43
3	Cingulum_Post_L	3	9	3,807796976	5,761260986	-12	-40	13
3	Cingulum_Post_R	7	21	12,27967164	6,310822487	15	-40	10
3	Hippocampus_L	36	108	22,69969957	6,042464733	-18	-37	7
3	Hippocampus_R	101	303	62,74278013	6,47459507	36	-16	-14
3	Amygdala_L	18	54	48,08209091	6,158958435	-27	-4	-14
3	Amygdala_R	5	15	11,84818548	5,617313862	30	-7	-14
3	Postcentral_L	254	762	38,35256423	6,45291996	-39	-22	40
3	Postcentral_R	121	363	18,60007063	6,43162632	60	-1	19
3	Parietal_Sup_L	55	165	15,6522276	6,772873878	-15	-58	58
3	Parietal_Sup_R	16	48	4,231647165	5,942252636	15	-58	58
3	Parietal_Inf_L	19	57	4,563028198	5,728992462	-24	-46	52
3	SupraMarginal_L	229	687	100	7,780508995	-57	-31	25
3	SupraMarginal_R	152	456	45,25118541	6,523241997	48	-34	28
3	Angular_L	7	21	3,506982097	5,460548878	-39	-49	31
3	Precuneus_L	85	255	14,15871599	6,597483635	-15	-55	58
3	Precuneus_R	105	315	18,89903522	6,463299751	12	-46	52
3	Paracentral_Lobule_L	10	30	4,356338028	5,831577301	-12	-34	49
3	Paracentral_Lobule_R	42	126	29,52409091	6,153942108	12	-40	52
3	Caudate_L	31	93	18,93739085	6,203315258	-15	-19	19
3	Caudate_R	18	54	10,64191147	8,112166405	21	26	1
3	Putamen_L	123	369	71,63866204	6,226644039	-27	-4	-8
3	Putamen_R	85	255	46,94732143	6,579864025	30	-19	7
3	Pallidum_L	36	108	72,20518771	5,98348856	-24	-1	-5
3	Pallidum_R	13	39	27,28467857	6,90857172	27	-13	-2
3	Thalamus_L	197	591	100	7,025936604	-12	-22	1
3	Thalamus_R	167	501	92,84852412	7,231006145	12	-16	-2
3	Heschl_L	28	84	73,13226667	5,82458353	-33	-22	7
3	Heschl_R	14	42	33,04168675	5,424775124	48	-13	7
3	Temporal_Sup_L	181	543	46,32764373	7,544578075	-57	-34	22
3	Temporal_Sup_R	26	78	4,864508118	5,95445776	60	2	4
3	Temporal_Pole_Sup_L	39	117	17,83589883	5,867267609	-54	5	-2
3	Temporal_Pole_Sup_R	29	87	12,73724215	6,454796314	57	14	-8
3	Temporal_Mid_L	67	201	7,967197491	5,755404949	-39	-52	16
4	Frontal_Mid_L	27	81	3,262819247	5,522698879	-33	47	22
5	Precentral_R	15	45	2,607231588	5,443593502	18	-28	70
