# Supplementary material for: Stomach-brain synchrony reveals a novel, delayed-connectivity resting-state network in humans
Source: eLife journal article supplement (doi:10.7554/elife.33321), 2018-03-21
Supplement: supp [file elife-33321-supp-v1.zip › elife_poa_e33321_Figure_3_source_data_3.csv]

Cluster #	Area name	N voxels	mm3	% area in cluster	t in peak	x	y	z
1	ParaHippocampal_R	6	18	3,114858657	4,233089924	18	-43	-5
1	Calcarine_R	36	108	11,36814616	4,805558205	21	-94	-5
1	Cuneus_R	3	9	1,23806882	4,214532375	21	-103	7
1	Lingual_R	257	771	65,66573478	6,86405611	27	-88	-14
1	Occipital_Sup_R	19	57	7,902144374	4,476432323	21	-103	4
1	Occipital_Mid_R	175	525	49,01918494	5,916437626	36	-91	4
1	Occipital_Inf_R	253	759	100	7,069989681	30	-85	-17
1	Fusiform_R	283	849	66,04869341	6,532314301	27	-85	-14
1	Temporal_Mid_R	52	156	6,931013835	4,710735798	42	-64	-5
1	Temporal_Inf_R	65	195	10,73897948	5,745028496	42	-64	-11
1	Cerebelum_Crus1_R	14	42	3,107016616	5,920640469	30	-85	-20
1	Cerebelum_4_5_R	2	6	1,365087108	3,88508749	27	-49	-20
1	Cerebelum_6_R	30	90	9,82178273	5,239090919	33	-79	-20
2	Calcarine_L	14	42	3,643658105	3,747834682	-9	-91	10
2	Cuneus_L	43	129	16,55950852	4,684537411	-12	-97	22
2	Lingual_L	132	396	37,02741766	4,89377737	-18	-91	-14
2	Occipital_Sup_L	193	579	83,03097365	7,29046917	-24	-91	31
2	Occipital_Mid_L	466	1398	83,74746789	7,044043541	-27	-91	28
2	Occipital_Inf_L	213	639	100	5,972698212	-42	-70	-14
2	Fusiform_L	228	684	58,00379221	6,20429039	-39	-67	-14
2	Temporal_Inf_L	21	63	3,856584375	5,447815895	-42	-64	-11
2	Cerebelum_Crus1_L	13	39	2,934963504	4,348130226	-39	-70	-20
2	Cerebelum_4_5_L	2	6	1,044746667	3,647315979	-18	-55	-14
2	Cerebelum_6_L	7	21	2,42838843	4,181003571	-21	-58	-14
3	Precentral_L	363	1089	60,50034317	6,143418789	-24	-22	73
3	Precentral_R	644	1932	100	6,273437023	42	-19	55
3	Frontal_Sup_R	39	117	5,650673077	5,207830906	36	-13	70
3	Frontal_Mid_R	55	165	6,332650862	5,182064056	45	-4	61
3	Frontal_Inf_Oper_L	5	15	2,830780347	4,356107712	-63	5	13
3	Frontal_Inf_Oper_R	77	231	32,34495354	5,378894806	42	2	25
3	Rolandic_Oper_L	118	354	70,04551515	4,658070087	-45	-16	22
3	Rolandic_Oper_R	233	699	100	6,09643507	42	-10	22
3	Supp_Motor_Area_L	162	486	44,34212389	4,964045048	-9	11	49
3	Supp_Motor_Area_R	281	843	69,6479418	5,189524651	12	-19	58
3	Insula_L	14	42	4,428083961	4,284789562	-39	-13	22
3	Insula_R	86	258	28,55345763	5,780797482	39	-10	22
3	Cingulum_Mid_L	18	54	5,449799073	4,455635548	-12	-16	46
3	Cingulum_Mid_R	18	54	4,801661371	4,32630825	15	-16	49
3	Postcentral_L	391	1173	59,03878983	6,067469597	-48	-16	58
3	Postcentral_R	481	1443	73,93912372	5,901028633	42	-22	52
3	Parietal_Sup_L	26	78	7,399234867	4,953569889	-24	-52	46
3	Parietal_Inf_L	52	156	12,4882877	5,413149357	-27	-52	43
3	Parietal_Inf_R	27	81	11,79709294	4,875143528	54	-28	49
3	SupraMarginal_R	40	120	11,90820669	4,682929516	54	-28	46
3	Paracentral_Lobule_L	117	351	50,96915493	5,73582077	-18	-22	73
3	Paracentral_Lobule_R	55	165	38,6625	4,517045498	9	-28	64
3	Putamen_R	7	21	3,86625	4,542452335	33	2	10
3	Heschl_L	12	36	31,3424	3,911545992	-60	-13	7
3	Heschl_R	3	9	7,080361446	3,753410339	54	-13	7
3	Temporal_Sup_L	52	156	13,3095993	4,046407223	-51	-7	4
3	Temporal_Sup_R	63	189	11,78707736	4,640209675	69	-22	7
3	Temporal_Pole_Sup_R	24	72	10,54116592	4,10058403	60	8	-5
