# Supplementary material for: Stomach-brain synchrony reveals a novel, delayed-connectivity resting-state network in humans
Source: eLife journal article supplement (doi:10.7554/elife.33321), 2018-03-21
Supplement: supp [file elife-33321-supp-v1.zip › elife_poa_e33321_Figure_4_source_data_1.csv]

0.156814728	0.352976286	0.0773583	0.084142294	0.172105895	0.480149288	0.038011151	0.027873011
0.189101821	0.245719013	0.091453141	0.181744354	0.102443746	0.236808733	0.162985638	0.211068877
0.192426373	0.1253609	0.07461681	0.158035783	0.424901774	0.240494657	0.118068205	0.324811377
0.041363871	0.002686538	0.007905652	0.002304015	0.065670349	0.151859638	0.024135796	0.005639199
0.567823605	0.160266712	0.396524415	0.321226547	0.546344	0.459737015	0.41522829	0.426613287
0.173494833	0.055021356	0.104448058	0.028631987	0.085746377	0.058929506	0.131730784	0.079953948
0.329827681	0.600630102	0.050474409	0.086134492	0.58017852	0.567089805	0.118679866	0.23579334
0.245857523	0.23755813	0.009588922	0.000231447	0.231188683	0.318724038	0.141077315	0.046934826
0.627399571	0.512329368	0.086088801	0.239232825	0.646975943	0.734088517	0.434724095	0.311788747
0.0727865	0.075256471	0.001033314	0.125674683	0.033143651	0.149871424	0.005450354	0.136004787
0.112879294	0.096788113	0.185972596	0.057077872	0.117948667	0.393217439	0.327219604	0.331631547
0.253209663	0.173916099	0.00214781	0.178113947	0.156299649	0.139935986	0.02396811	0.170819795
0.001681415	0.097177903	0.037222167	0.038579967	0.079082925	0.100091126	0.002170871	0.065640829
0.759664143	0.506032788	0.587625564	0.520045054	0.788703231	0.85118535	0.633517166	0.604624153
0.092222373	0.258054287	0.276364352	0.247833761	0.13037391	0.403781184	0.151760719	0.139083157
0.034978346	0.089705744	0.213503695	0.05057088	0.103287551	0.422446516	0.092045311	0.112561587
0.247503374	0.12308681	0.233053785	0.219430412	0.229138723	0.607554026	0.314230754	0.316922881
0.233130109	0.105409109	0.064648379	0.018415984	0.315412539	0.062878512	0.110989388	0.014800363
0.183570209	0.038212886	0.038066447	0.002476994	0.240656778	0.024738795	0.2138801	0.003729054
0.290427687	0.423433775	0.051559271	0.091570035	0.411292794	0.559022641	0.0058514	0.142123459
0.018764413	0.002225449	0.000360417	0.054634929	0.012212672	0.062394297	0.013160044	0.079388792
0.539494066	0.179443153	0.486916368	0.365539905	0.556439764	0.51998253	0.52097667	0.332869133
0.180149856	0.17943874	0.136030639	0.024498929	0.102454892	0.443416247	0.245659076	0.057390934
0.867553491	0.249279776	0.431655947	0.189701561	0.851523086	0.6903759	0.346603465	0.370990368
0.384449747	0.507695825	0.433558698	0.697021233	0.76805055	0.8788878	0.518410046	0.784566363
0.718499825	0.144573522	0.411728878	0.334726317	0.850109567	0.841057743	0.495394678	0.535927483
0.653977089	0.093975218	0.251272478	0.340828528	0.683417757	0.349951992	0.305070337	0.350206069
0.628002349	0.296752148	0.579829542	0.097621254	0.750784878	0.700214915	0.504785728	0.171988884
0.438047161	0.046207948	0.203398957	0.073742527	0.479743614	0.452371294	0.345844529	0.093162161
0.735944236	0.495430719	0.06762031	0.126540006	0.798582399	0.728750586	0.4833193	0.177431069
