# Supplementary material for: Stomach-brain synchrony reveals a novel, delayed-connectivity resting-state network in humans
Source: eLife journal article supplement (doi:10.7554/elife.33321), 2018-03-21
Supplement: supp [file elife-33321-supp-v1.zip › elife_poa_e33321_Figure_4_source_data_2.csv]

0.021504916	0.321170587	0.001336594	0.161025274	0.131702873	0.313952167	0.000475199	0.15392699
0.145947742	0.406308501	0.186732009	0.007801034	0.314558944	0.377189506	0.091619857	0.043829404
0.253174227	0.584362636	0.150980573	0.172972887	0.381553397	0.711065893	0.106326169	0.395041389
0.000169007	0.056404689	0.004296932	0.053485092	0.081076855	0.094707181	0.002185202	0.145800453
0.323615059	0.426393582	0.146079335	0.206795847	0.448913917	0.707387302	0.284474625	0.406540086
0.094252351	0.324577743	0.103996193	0.054232869	0.120453664	0.392731078	0.202418974	0.203867219
0.247396415	0.479805371	0.072019495	0.072977617	0.565317666	0.488877137	0.124783433	0.14867658
0.10636395	0.065826766	0.085750136	0.033431044	0.133298511	0.11335226	0.11560305	0.080446317
0.36356611	0.583022327	0.230049713	0.209114765	0.634078959	0.686410017	0.413601334	0.30819279
0.085354833	0.18577707	5.73E-06	0.126267676	0.234513257	0.441909987	0.091306876	0.171293513
0.09808008	0.213778053	0.077110647	0.025014902	0.199493365	0.324571781	0.044498272	0.1320785
0.269327396	0.204707598	0.039042109	0.149688788	0.102059973	0.244436439	0.039268875	0.131981438
0.00107133	0.289093672	0.01370569	0.045188784	0.047744132	0.301530991	0.160511003	0.215617755
0.628138582	0.745835878	0.464680124	0.625651434	0.811863541	0.849174805	0.610873433	0.554972082
0.160871073	0.267875528	0.247660593	0.15453685	0.278228448	0.399950233	0.278547455	0.239771564
0.102815346	0.246421943	0.005322824	0.044440485	0.016185375	0.224245927	0.041519297	0.111233047
0.204851412	0.275384022	0.385373274	0.34027918	0.195803322	0.633641758	0.599170323	0.461394462
0.151935813	0.266015805	0.054558727	0.00331092	0.381889381	0.30035105	0.07564538	0.033895904
0.001611694	0.148090361	0.006732726	0.065960012	0.080319976	0.217462366	0.103702974	0.099580433
0.27459062	0.473060214	0.00242776	0.06459304	0.356671935	0.653389826	0.020677289	0.144049946
0.010327271	0.297623857	0.186575059	0.05234502	0.001323633	0.279169558	0.073919517	0.12946516
0.235399239	0.320517678	0.317175095	0.258260371	0.310154704	0.397550293	0.365358532	0.251377561
0.10862081	0.273966254	0.103497374	0.078995317	0.159768938	0.339796482	0.153433325	0.141254807
0.458826154	0.622094826	0.325471876	0.436755885	0.616213641	0.649922869	0.537006035	0.300947452
0.137828625	0.843084428	0.252859306	0.782382121	0.759130008	0.894105177	0.505014748	0.786588843
0.372608281	0.425418911	0.316567528	0.183628692	0.599032245	0.695408209	0.510589489	0.247153617
0.453953646	0.058045514	0.201729957	0.248714001	0.502956258	0.183635497	0.328175045	0.207982077
0.470659789	0.408224886	0.451632428	0.225445257	0.5684698	0.627423863	0.538535507	0.212671406
0.254198545	0.338989939	0.314759692	0.204283122	0.335908873	0.827350684	0.363018006	0.21932621
0.735865571	0.484440298	0.030713383	0.142205786	0.744750813	0.779900771	0.469667944	0.140380628
