# Supplementary material for: Stomach-brain synchrony reveals a novel, delayed-connectivity resting-state network in humans
Source: eLife journal article supplement (doi:10.7554/elife.33321), 2018-03-21
Supplement: supp [file elife-33321-supp-v1.zip › elife_poa_e33321_Table_2_source_data_1.csv]

female	Age	IMC	trait anxiety	Peak	power	cs vocc	cs docc	cs mwm	cs sir	cs pcs	cs dprec	cs rsc	cs siil	cs eba	cs siir	cs ladprec	cs spos
1	25	23,52941176	38	0,042	742,2500513	0,041679242	0,100758212	0,022921216	0,026072658	0,093258975	0,062218907	0,032714057	0,032325147	-0,014243341	0,076817901	0,034534599	0,097188929
1	22	17,47471743	41	0,043	105,43	0,018662951	-0,021895395	0,010131687	0,082777768	0,011464286	0,017295676	0,068182125	-0,019867039	0,098687927	-0,017020794	-0,002791522	-0,009029243
0	27	20,90238586	32	0,045	7,14	0,009736694	0,020731343	0,015714158	0,046187823	-0,011063495	0,020346792	0,016918936	0,053999962	-0,027546798	0,031204305	0,043138557	0,0144441
1	27	21,30394858	37	0,053	618	0,064749872	0,084104873	0,027552314	0,047011972	0,022493994	0,005046477	0,107501301	0,007086742	0,026617624	0,030923786	0,007754969	0,055224063
0	32	21,55102041	26	0,052	78	0,051251346	0,130607123	0,086691702	0,088059346	0,118292647	0,084436208	0,1086518	0,09351617	0,149700566	0,091328345	0,042871184	0,084624535
1	22	21,45357371	25	0,043	27	0,039975952	0,043361623	0,026678307	0,055275224	-0,007400171	0,08050153	0,089972354	0,101351473	0,034090137	0,07837288	0,036619777	0,039183494
0	21	20,19946976	30	0,047	90	0,00696744	-0,005534448	0,018840244	-0,008334383	0,042876061	0,03872243	0,094839669	-0,003130497	0,008381635	0,019743754	0,015670772	0,010165277
1	22	21,0076678	52	0,047	65	0,035604439	0,046728535	-0,010426529	0,108695068	0,006236236	0,166149535	0,038253902	0,034551769	0,050720116	0,072638525	0,039510562	-0,003387423
0	24	24,22145329	34	0,044	46	0,175820729	0,156143055	0,114419015	0,118662907	0,130595188	0,154181279	0,118750164	0,110831819	0,089574236	0,115753154	0,193838095	0,088517332
0	26	22,72440348	30	0,051	370	0,037009641	0,031819395	-0,010360251	0,04744118	0,035937568	0,040846687	0,048600574	0,011141001	0,05151034	-0,014439436	0,029359401	0,073206998
1	22	19,72318339	22	0,051	80	0,033708255	0,010926098	0,041250162	0,032816621	0,025428118	0,021130405	0,073133156	0,037352975	0,051285414	0,027578009	0,042116154	0,089597808
1	29	23,30668005	52	0,052	20	0,011891741	0,030019738	-0,00208178	0,003986005	-0,013095635	0,011070764	0,043136739	0,011020741	0,047858986	-0,022217116	0,10621384	0,036526619
1	22	20,3125	39	0,047	206	0,084920952	0,07120238	0,041561536	-0,013538937	0,044180449	-0,02652725	0,015873077	0,008423505	-0,016608863	0,094398171	-0,041547253	0,031914157
0	24	21,84700852	38	0,05	129	0,140390365	0,109841534	0,111616601	0,17702325	0,158373268	0,11355058	0,061458914	0,174045028	0,123138722	0,114812828	0,140500565	0,127371327
1	21	18,67093431	25	0,041	25	0,079389094	0,061548272	0,195366569	0,082901708	0,115508287	0,201591479	0,144249332	0,119297538	0,145976131	0,140392486	0,160731422	-0,007766957
0	21	22,34351559	32	0,049	43	0,030577105	0,044838736	0,048471025	0,075777033	0,074946019	0,043628131	-0,017268371	0,048886152	0,042481256	0,032846363	0,10495688	0,01669091
0	23	23,67125363	30	0,049	31	0,15487028	0,107099249	0,187713143	0,025699681	0,183450115	0,149970646	0,152842832	0,176513696	0,146363027	0,116000871	0,226703061	0,198018747
1	21	18,02595738	35	0,043	190	-0,00709746	0,02656377	0,051159143	0,018836108	0,041713394	0,023535344	-0,005663619	0,023400676	0,014180693	0,041192386	0,073850642	-0,017977435
1	27	18,90690102	32	0,046	2757	-0,001295182	-0,051392454	0,058498911	0,02719627	0,021910217	0,028974617	0,017056219	0,04855475	0,031363915	0,061808002	0,084730151	0,000227956
0	22	21,14631991	25	0,049	341	0,047518691	0,067325308	0,047393226	0,011902508	0,058196179	0,051523469	0,028005183	0,122408227	0,072170733	0,050262965	0,058027516	0,06667395
1	26	23,71184463	44	0,045	48	0,072832434	0,075821325	0,082538987	0,038073271	0,04522666	0,022180038	0,092067406	0,067389555	0,07287038	0,059052449	0,072645452	0,099395877
1	22	20,06095444	44	0,047	47	0,111409305	0,132035823	0,124959075	0,044863869	0,157511594	0,077666204	0,044246593	0,095081852	0,013632918	0,077876099	0,061980437	0,150012738
0	24	24,48979592	48	0,046	101	0,058219984	0,071137605	0,069287799	0,07242179	0,009451746	-0,024226531	0,054082755	0,026780851	0,023618731	0,043423422	0,001814912	0,04844127
0	21	23,8497766	28	0,05	106	0,094726989	0,087938153	0,083617039	0,103652212	0,136379351	0,142585036	0,15724312	0,066400922	0,015612195	0,032043598	0,062377496	0,144624724
1	28	21,23057202	38	0,051	860	0,015128272	-0,024715577	0,054795137	0,062520115	0,027402958	0,013630051	0,017253937	0,062286066	0,057579104	0,059079553	0,010968691	-0,015435289
0	24	19,04700413	29	0,049	1953	0,055242953	0,102266764	0,089409997	0,101176875	0,105107564	0,094870151	0,098029917	0,038607703	0,174998387	-0,00883163	0,034801214	0,048494161
1	22	22,58955144	53	0,043	13	0,04087981	0,008637817	0,036985171	0,049843844	-0,026740968	-0,014568566	-0,000479886	0,019854874	0,022281649	0,050706392	0,006579542	0,022303809
0	33	22,5981405	37	0,041	33	0,277009571	0,296185003	0,248133437	0,183710126	0,222914173	0,239361094	0,190803555	0,246024358	0,168878263	0,196576885	0,207403742	0,185889266
0	20	23,54570637	39	0,052	36	0,009066627	-0,026553259	0,052434302	-0,02886659	-0,004154461	-0,057427926	-0,062494692	0,094142232	0,037189286	0,077709219	2,59E-05	0,007052318
0	26	20,98765432	48	0,047	82	0,096014052	0,026558306	-0,004808865	0,082439689	0,048492526	0,082554585	0,072799184	0,031967458	0,051004064	0,054933923	0,017135837	0,038120103
